# Supplementary material for: Convolutional Neural Network Classification of Exhaled Aerosol Images for Diagnosis of Obstructive Respiratory Diseases
Source: MDPI journal article supplement (doi:10.3390/jnt4030011), 2023-06-26
Supplement: s1 [file s1]

**Table S1.** Round-3-25% performance comparison among models (AlexNet, ResNet-50, MobileNet, and EfficientNet) that were trained on (90% Base, Th1,2, and 25% Outbox) and tested on samples with decreasing similarities (Level 1, Inbox, Outbox) for both 2-class and 3-class classifications.

| Round 3-25%         |             | 2 – Classes |       |        | 3 – Classes |       |        |
|---------------------|-------------|-------------|-------|--------|-------------|-------|--------|
| Network             | (%)         | Level 1     | Inbox | Outbox | Level 1     | Inbox | Outbox |
| <b>AlexNet</b>      | Accuracy    | 98.73       | 98.13 | 97.38  | 98.09       | 85.77 | 93.06  |
|                     | AUC         | 99.95       | 99.96 | 99.61  | 98.90       | 99.97 | 98.84  |
|                     | Specificity | 100         | 100   | 98.48  | 98.99       | 80.56 | 91.67  |
|                     | Sensitivity | 96.55       | 94.25 | 95.63  | 96.55       | 96.55 | 95.24  |
|                     | Precision   | 100         | 100   | 97.57  | 98.25       | 70.59 | 87.91  |
| <b>ResNet – 50</b>  | Accuracy    | 99.36       | 99.63 | 97.84  | 97.45       | 84.83 | 95.06  |
|                     | AUC         | 99.69       | 100.  | 99.51  | 99.95       | 99.96 | 98.69  |
|                     | Specificity | 100         | 100   | 100    | 96.97       | 78.33 | 96.21  |
|                     | Sensitivity | 98.28       | 98.85 | 94.44  | 98.28       | 98.28 | 93.25  |
|                     | Precision   | 100         | 100   | 100    | 95.00       | 68.67 | 94.00  |
| <b>MobileNet</b>    | Accuracy    | 98.10       | 97.57 | 94.14  | 94.27       | 78.28 | 87.35  |
|                     | AUC         | 99.81       | 99.57 | 98.61  | 99.53       | 99.49 | 98.59  |
|                     | Specificity | 100         | 99.72 | 94.70  | 94.95       | 71.39 | 83.84  |
|                     | Sensitivity | 83          | 93.10 | 93.25  | 93.10       | 92.53 | 92.86  |
|                     | Precision   | 100         | 99.39 | 91.80  | 91.53       | 60.98 | 78.52  |
| <b>EfficientNet</b> | Accuracy    | 93.63       | 90.64 | 87.50  | 84.18       | 68.73 | 80.09  |
|                     | AUC         | 98.87       | 96.16 | 95.39  | 99.37       | 97.61 | 95.99  |
|                     | Specificity | 93.94       | 95.28 | 84.85  | 83.84       | 61.67 | 80.05  |
|                     | Sensitivity | 93.10       | 81.03 | 91.67  | 84.48       | 83.33 | 80.16  |
|                     | Precision   | 90.00       | 89.24 | 79.38  | 75.39       | 51.24 | 71.89  |

**Table S2.** Round-3-50% performance comparison among models (AlexNet, ResNet-50, MobileNet, and EfficientNet) that were trained on (90% Base, Th1,2, and 50% Outbox) and tested on samples with decreasing similarities (Level 1, Inbox, Outbox) for both 2-class and 3-class classifications.

| Round 3-50%         |             | 2 – Classes |       |        | 3 – Classes |       |        |
|---------------------|-------------|-------------|-------|--------|-------------|-------|--------|
| Network             | (%)         | Level 1     | Inbox | Outbox | Level 1     | Inbox | Outbox |
| <b>AlexNet</b>      | Accuracy    | 99.36       | 97.75 | 99.07  | 92.99       | 78.46 | 94.14  |
|                     | AUC         | 99.97       | 99.98 | 99.88  | 99.13       | 99.87 | 99.48  |
|                     | Specificity | 100         | 100   | 99.49  | 89.90       | 71.11 | 91.92  |
|                     | Sensitivity | 98.28       | 93.10 | 98.41  | 98.28       | 93.68 | 97.62  |
|                     | Precision   | 100         | 100   | 99.20  | 85.07       | 61.05 | 88.49  |
| <b>ResNet – 50</b>  | Accuracy    | 100         | 97.94 | 99.85  | 99.36       | 88.20 | 97.38  |
|                     | AUC         | 100         | 99.97 | 100    | 100         | 99.99 | 99.98  |
|                     | Specificity | 100         | 100   | 100    | 98.99       | 83.28 | 95.96  |
|                     | Sensitivity | 100         | 93.68 | 99.60  | 100         | 98.28 | 99.60  |
|                     | Precision   | 100         | 100   | 100    | 98.31       | 74.03 | 94.01  |
| <b>MobileNet</b>    | Accuracy    | 98.73       | 95.69 | 98.15  | 99.24       | 76.78 | 95.06  |
|                     | AUC         | 99.81       | 99.36 | 99.75  | 99.76       | 97.81 | 99.91  |
|                     | Specificity | 98.99       | 98.61 | 98.23  | 100         | 72.22 | 93.18  |
|                     | Sensitivity | 98.28       | 89.66 | 98.02  | 97.56       | 86.21 | 98.02  |
|                     | Precision   | 98.28       | 96.89 | 97.24  | 100         | 60.00 | 90.15  |
| <b>EfficientNet</b> | Accuracy    | 96.18       | 91.76 | 95.68  | 89.81       | 68.35 | 90.28  |
|                     | AUC         | 99.41       | 95.48 | 99.22  | 99.10       | 96.08 | 99.39  |
|                     | Specificity | 97.98       | 96.67 | 96.97  | 86.87       | 60.56 | 87.63  |
|                     | Sensitivity | 93.10       | 81.61 | 93.65  | 94.83       | 84.48 | 94.44  |
|                     | Precision   | 96.43       | 92.21 | 95.16  | 80.88       | 50.87 | 82.93  |

**Table S3.** Round-3-75% performance comparison among models (AlexNet, ResNet-50, MobileNet, and EfficientNet) that were trained on (90% Base, Th1,2, and 75% Outbox) and tested on samples with decreasing similarities (Level 1, Inbox, Outbox) for both 2-class and 3-class classifications.

| Round 3-75%         |             | 2 – Classes |       |        | 3 – Classes |       |        |
|---------------------|-------------|-------------|-------|--------|-------------|-------|--------|
| Network             | (%)         | Level 1     | Inbox | Outbox | Level 1     | Inbox | Outbox |
| <b>AlexNet</b>      | Accuracy    | 99.36       | 98.50 | 99.69  | 100         | 87.27 | 98.46  |
|                     | AUC         | 100         | 99.96 | 100    | 100         | 99.97 | 100    |
|                     | Specificity | 100         | 99.72 | 99.49  | 100         | 82.22 | 97.73  |
|                     | Sensitivity | 98.28       | 95.98 | 100    | 100         | 97.70 | 99.60  |
|                     | Precision   | 100         | 99.40 | 99.21  | 100         | 72.65 | 96.54  |
| <b>ResNet – 50</b>  | Accuracy    | 99.36       | 98.69 | 98.77  | 98.73       | 84.46 | 98.92  |
|                     | AUC         | 100         | 100   | 99.97  | 100         | 99.99 | 100    |
|                     | Specificity | 100         | 100   | 99.24  | 97.98       | 79.44 | 98.23  |
|                     | Sensitivity | 98.28       | 95.98 | 98.02  | 100         | 94.83 | 100    |
|                     | Precision   | 100         | 100   | 98.80  | 96.67       | 69.04 | 97.30  |
| <b>MobileNet</b>    | Accuracy    | 100         | 95.51 | 98.30  | 96.18       | 75.09 | 96.91  |
|                     | AUC         | 100         | 99.19 | 99.91  | 100         | 99.64 | 99.96  |
|                     | Specificity | 100         | 98.89 | 98.23  | 93.94       | 67.78 | 95.45  |
|                     | Sensitivity | 100         | 88.51 | 98.41  | 100         | 90.23 | 99.21  |
|                     | Precision   | 100         | 97.47 | 97.25  | 90.63       | 57.51 | 93.28  |
| <b>EfficientNet</b> | Accuracy    | 98.10       | 89.14 | 97.99  | 89.10       | 65.92 | 95.06  |
|                     | AUC         | 99.55       | 95.81 | 99.93  | 99.91       | 95.05 | 99.94  |
|                     | Specificity | 98.99       | 97.22 | 97.98  | 85.86       | 59.17 | 92.68  |
|                     | Sensitivity | 96.55       | 72.41 | 98.02  | 96.52       | 79.89 | 98.81  |
|                     | Precision   | 98.25       | 92.65 | 96.86  | 80          | 48.60 | 89.57  |
